# Supplementary material for: DMAI-driven all-inorganic antimony-based perovskite-inspired solar cells with record open-circuit voltage
Source: Royal Society of Chemistry journal article supplement (doi:10.1039/d2ta07971b), 2023-01-01
Supplement: d2ta07971b1.pdf [file d2ta07971b1.pdf]

## Electronic Supplementary Information

### DMAI-driven all-inorganic antimony-based perovskite-inspired solar cells with record open-circuit voltage

*Yixin Guo,<sup>a</sup> Fei Zhao,<sup>b,\*</sup> Peizhi Yang,<sup>c,\*</sup> Minjie Gao,<sup>d</sup> Junhao Shen,<sup>d</sup> Jiahua Tao,<sup>d</sup> Jinchun Jiang<sup>d</sup> and*

*Junhao Chu<sup>d,e</sup>*

<sup>a</sup> Department of Physics, Shanghai Normal University, Shanghai, 200233, China

<sup>b</sup> School of Photoelectric Engineering, Changzhou Institute of Technology,  
Changzhou, Jiangsu, 213002, China

<sup>c</sup>Key Laboratory of Advanced Technique & Preparation for Renewable Energy  
Materials, Ministry of Education, Yunnan Normal University, Kunming, 650500,  
China

<sup>d</sup> Department of Materials, Engineering Research Center for Nanophotonics &  
Advanced Instrument (Ministry of Education), School of Physics and  
Electronic Science, East China Normal University, Shanghai 200241, China

<sup>e</sup> Institute of Optoelectronics, Fudan University, Shanghai 200241, China

\*Corresponding author.

E-mail addresses: zhaofei@czu.cn; pzyang@hotmail.com

## Experimental Procedures

**Device Fabrication:** Pre-etched fluorine doped tin oxide (FTO) substrates were firstly washed with soap water, deionized water, ethanol and dried by high-purity nitrogen gas. Then, 100nm  $\text{Nb}_2\text{O}_5$  compact layer films were sputtered by a high vacuum sputter system (Beijing Technol Science, JCP-450) and annealed in an oven at  $500^\circ\text{C}$  for 30 min. The detail of sputter process can be found in related references. To form the  $\text{RbCl}/\text{Nb}_2\text{O}_5$ , 1mg/mL  $\text{RbCl}$  (Sigma-Aldrich, 99.95%) aqueous solution was spin-coated on  $\text{Nb}_2\text{O}_5$  surface and then annealed at  $500^\circ\text{C}$  for 30 min. The precursor solution was prepared by dissolving 0.75 M  $\text{CsI}$  (Sigma-Aldrich, 99.9%), 0.25 M  $\text{SbI}_3$  (Sigma-Aldrich, 98%) and 0.3125 M  $\text{SbCl}_3$  (Sigma-Aldrich, 99.95%) in DMF (Sigma-Aldrich, 99.8%) solution. The DMAI incorporated  $\text{Cs}_3\text{Sb}_2\text{Cl}_x\text{I}_{9-x}$  films were fabricated by adding the certain amount DMAI (Sigma-Aldrich) in precursor solution. Then, the precursor solution was spin-coated onto  $\text{Nb}_2\text{O}_5$  coated substrates at 3000 rpm for 30 s and post-annealed under  $\text{SbI}_3$  vapor environment at  $250^\circ\text{C}$  for 10 min. For the hole transport layer (HTL) layer, 6 mg/mL P3HT (Sigma-Aldrich) solution were spin-coated on the top of  $\text{Cs}_3\text{Sb}_2\text{Cl}_x\text{I}_{9-x}$  film at 3000 rpm and annealed for 5 min at  $100^\circ\text{C}$ . After the films cooled to room temperature, commercial carbon paste was screen-printed on the top of HTL layer and dried on a hot plate at  $120^\circ\text{C}$  for 15 min.

**Characterization:** Grazing Incidence X-ray diffraction (GIXRD) measurements were carried out by a X-ray Powder diffractometer (Bruker D8 Advance). X-ray photoelectron spectroscopy (XPS) measurements were conducted by a Thermo SCIENTIFIC ESCALAB 250X with a He-discharge UV source (21.2 eV) for ultraviolet photoelectron spectroscopy (UPS) measurements. Time-of-flight secondary-ion massspectrometry (ToF-SIMS) depth profiles were measured with a Bruker ultraflextreme MALDI-TOF. Optical absorbance spectra of the films were recorded by a Cary5000 UV-VIS-NIR spectrophotometer. Scanning Electron Microscopy (SEM) measurements were characterized by a HITACHI S-4800 SEM. The photoluminescence (PL) and transient-photoluminescence (TRPL) spectra were measured by a HORIBA spectrophotometer with a excitation source of 532 nm. The

current density–voltage (J-V) characteristics of PISCs were conducted by a Keithley 2400 digital source meter with a solar simulator (Newport Oriel Sol3A) calibrated to AM 1.5, 100 mW/cm<sup>2</sup> using a standard silicon photodiode (Newport Oriel 91150V) with an masked active area of 0.09 cm<sup>2</sup>. The incident photo-to-current conversion efficiency (IPCE) was performed by QTEST 1000AD Station using a calibrated reference Si-cell. The electrochemical impedance spectroscopy (EIS) was recorded by a Bio-Logic VMP3 electrochemical workstation under dark.

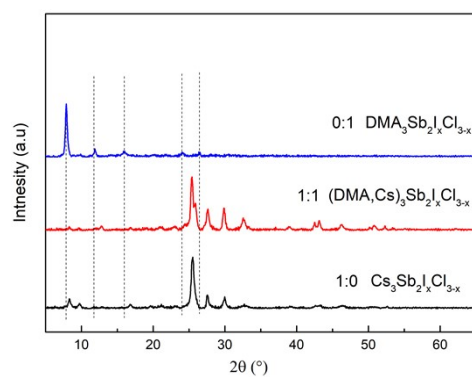

**Figure S1.** XRD patterns of  $\text{A}_3\text{Sb}_2\text{Cl}_x\text{I}_{9-x}$  films (A=DMA/Cs).

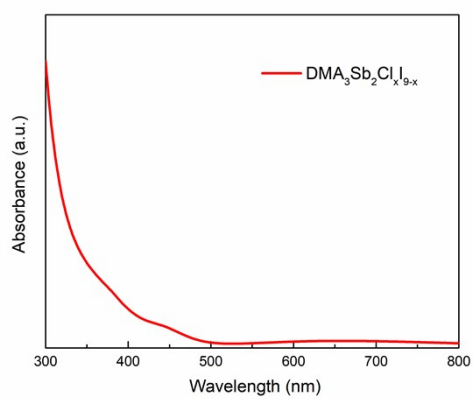

**Figure S2.** Optical absorbance spectra of  $\text{DMA}_3\text{Sb}_2\text{Cl}_x\text{I}_{9-x}$  film.

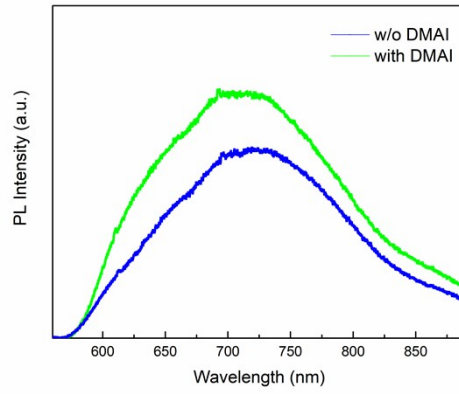

**Figure S3.** PL spectra for  $\text{Cs}_3\text{Sb}_2\text{Cl}_x\text{I}_{9-x}$  films with/without DMAI additive.

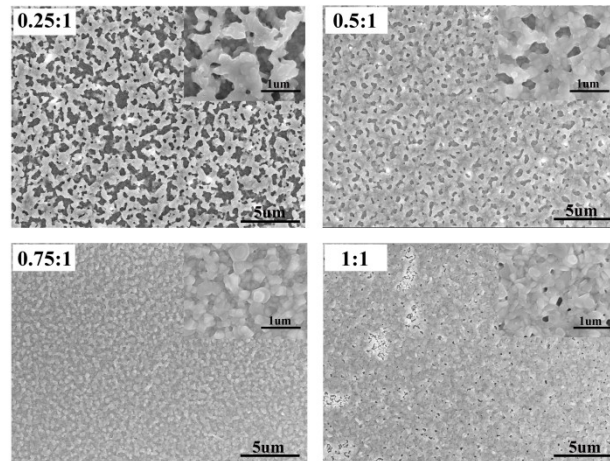

**Figure S4.** SEM picture of  $\text{Cs}_3\text{Sb}_2\text{Cl}_x\text{I}_{9-x}$  films prepared with different CsI/DMAI ratio.

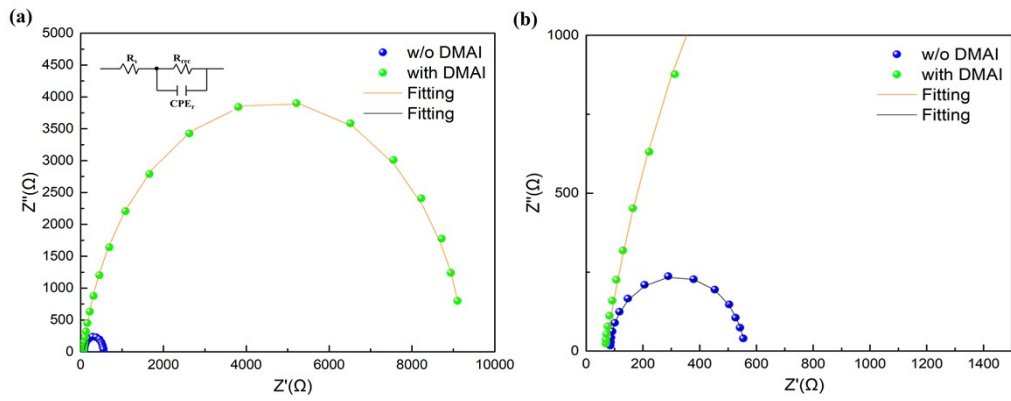

**Figure S5.** (a) Enlarged and (b) overall Nyquist plots of  $\text{Cs}_3\text{Sb}_2\text{Cl}_x\text{I}_{9-x}$  PISCs with/without DMAI additive.

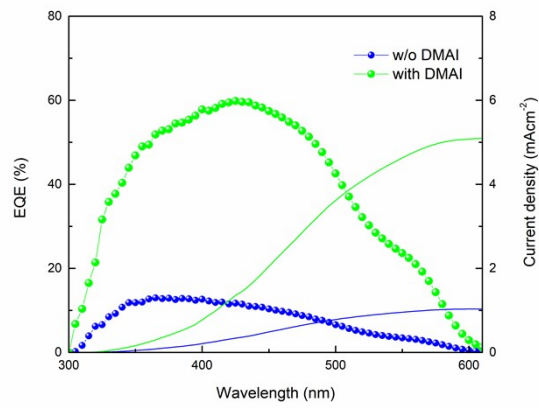

**Figure S6.** IPCE curves for  $\text{Cs}_3\text{Sb}_2\text{Cl}_x\text{I}_{9-x}$  PISCs with/without DMAI additive.

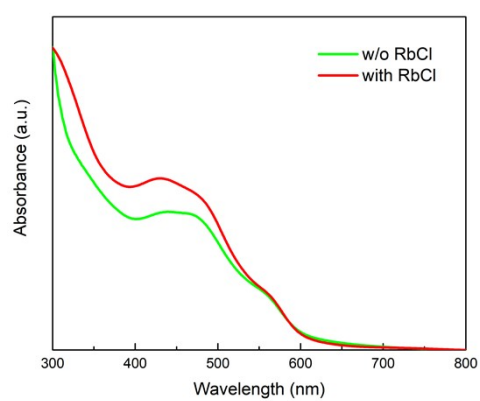

**Figure S7.** Optical absorbance for  $\text{Cs}_3\text{Sb}_2\text{Cl}_x\text{I}_{9-x}$  film on  $\text{Nb}_2\text{O}_5$  and  $\text{RbCl}/\text{Nb}_2\text{O}_5$  substrates.

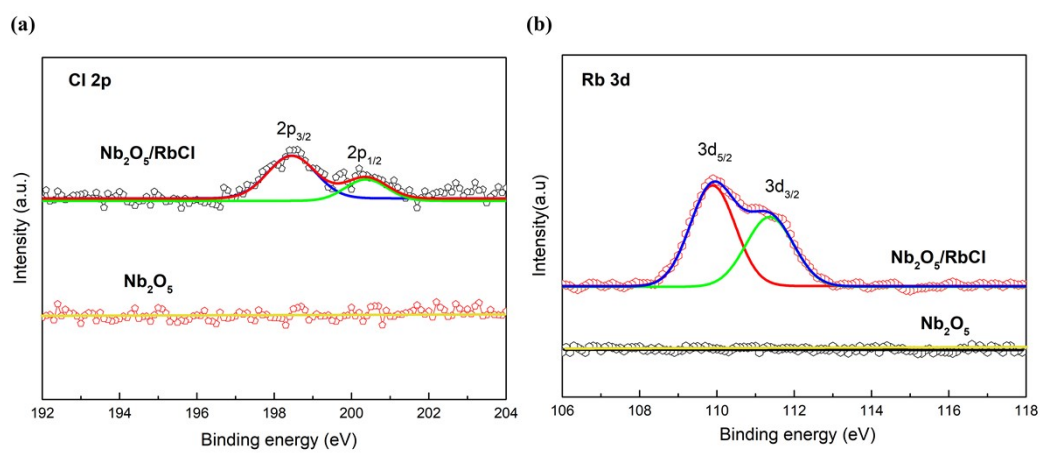

**Figure S8.** (a) XPS spectra for Cl 2p core level. (b) XPS spectra for Rb 3d core level.

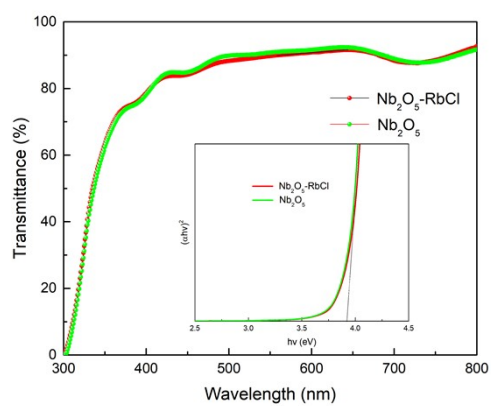

**Figure S9.** Optical transmittance for RbCl/Nb<sub>2</sub>O<sub>5</sub> and Nb<sub>2</sub>O<sub>5</sub> film.

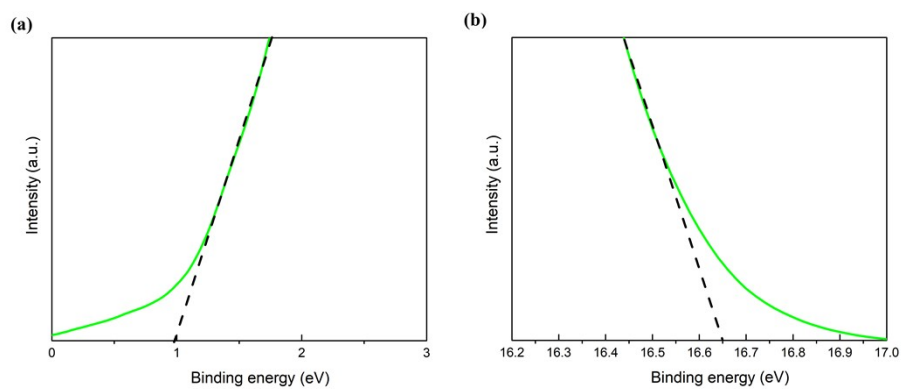

**Figure S10.** Fermi edges and secondary electron cutoff edges of D-Cs<sub>3</sub>Sb<sub>2</sub>Cl<sub>x</sub>I<sub>9-x</sub> film with RbCl interface modification.



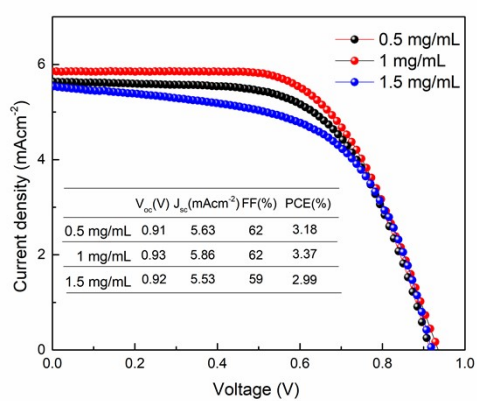

**Figure S11.** J-V curves for PISCs with different RbCl interface modification concentration.

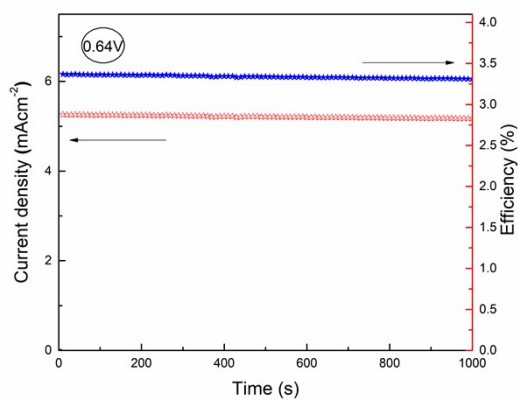

**Figure S12.** Stable output curve of  $J_{sc}$  and PCE for PISC with RbCl interface modification at maximum power point.

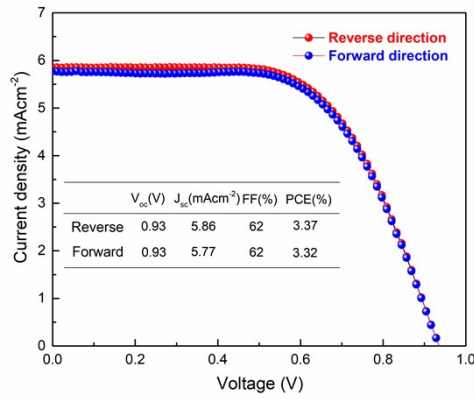

**Figure S13.** J-V curves for PISC with RbCl interface modification under different scanning directions.

**Table S1.** TRPL parameters for  $Cs_3Sb_2Cl_xI_{9-x}$  films with/without DMAI additive.

| Sample    | $A_1$ | $\tau_1$ (ns) | $A_2$ | $\tau_2$ (ns) | $\tau_{avg}$ (ns) |
|-----------|-------|---------------|-------|---------------|-------------------|
| w/o DMAI  | 0.14  | 1.57          | 0.86  | 13.54         | 3.24              |
| with DMAI | 0.68  | 2.03          | 0.32  | 27.15         | 10.06             |

**Table S2.** EIS parameters of  $Cs_3Sb_2Cl_xI_{9-x}$  PISCs with/without DMAI additive.

| Sample    | $R_s$ (ohm) | $R_{rec}$ (ohm) |
|-----------|-------------|-----------------|
| w/o DMAI  | 83          | 477             |
| with DMAI | 69          | 9246            |

**Table S3.** Temperature-related J-V performance parameters of PISCs with DMAI additive.

| Sample | $V_{oc}$ (V)                    | $J_{sc}$ (mAcm <sup>-2</sup> ) | FF (%)         | PCE (%)            |
|--------|---------------------------------|--------------------------------|----------------|--------------------|
| 100°C  | 0.79 (0.76 ± 0.02) <sup>a</sup> | 0.85 (0.82 ± 0.21)             | 56 (53 ± 1.04) | 0.38 (0.34 ± 0.11) |
| 150°C  | 0.81 (0.8 ± 0.01)               | 2.62 (2.27 ± 0.32)             | 54 (52 ± 1.41) | 1.15 (0.96 ± 0.21) |
| 200°C  | 0.84 (0.82 ± 0.03)              | 4.56 (4.26 ± 0.19)             | 56 (55 ± 1.55) | 2.15 (1.93 ± 0.15) |
| 250°C  | 0.89 (0.87 ± 0.01)              | 5.21 (4.95 ± 0.23)             | 59 (58 ± 1.52) | 2.74 (2.46 ± 0.12) |

<sup>a</sup> Statistic performance from 16 individual devices

**Table S4.** J-V performance parameters of PISCs with/without RbCl interface modification.

| Sample    | $V_{oc}$ (V)                    | $J_{sc}$ (mA cm <sup>-2</sup> ) | FF (%)         | PCE (%)            |
|-----------|---------------------------------|---------------------------------|----------------|--------------------|
| w/o RbCl  | 0.89 (0.87 ± 0.01) <sup>a</sup> | 5.21 (4.95 ± 0.23)              | 59 (58 ± 1.52) | 2.74 (2.46 ± 0.12) |
| with RbCl | 0.93 (0.91 ± 0.01)              | 5.86 (5.75 ± 0.18)              | 62 (60 ± 1.14) | 3.37 (3.15 ± 0.12) |

<sup>a</sup> Statistic performance from 16 individual devices
